# Supplementary material
Source: Springer Nature journal article supplement (https://www.springermedizin.de/resource/supplementary/12899_2012_200_MOESM2_ESM.pdf/9514664)

Urinary bladder  
Control.

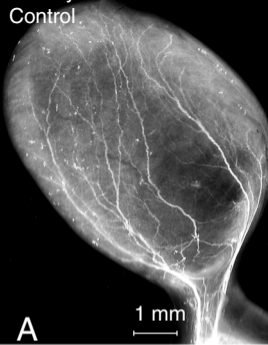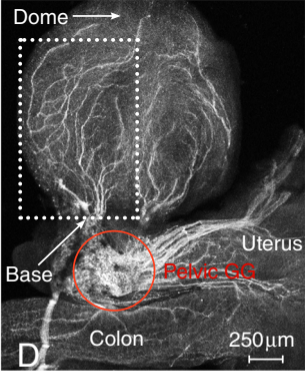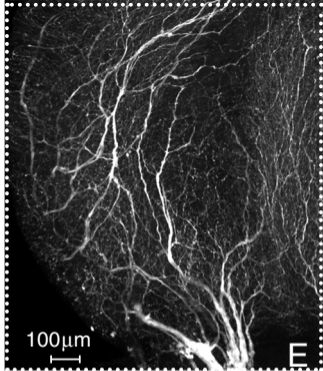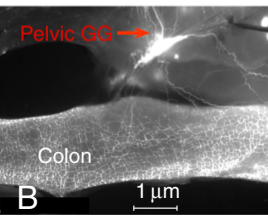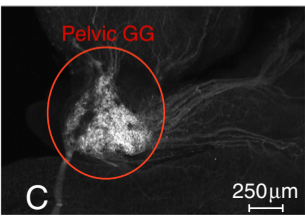

Supplement: MOESM2 [file 9514664]
